RESEARCH PAPER

# Effect of carbohydrates and night temperature on night respiration in rice

Sébastien Peraudeau<sup>1</sup>, Tanguy Lafarge<sup>1</sup>, Sandrine Roques<sup>1</sup>, Cheryl O. Quiñones<sup>2</sup>, Anne Clement-Vidal<sup>1</sup>, Pieter B. F. Ouwkerk<sup>3</sup>, Jeroen Van Rie<sup>3</sup>, Denis Fabre<sup>1</sup>, Krishna S. V. Jagadish<sup>2</sup> and Michael Dingkuhn<sup>1,2,\*</sup>

<sup>1</sup> CIRAD, UMR AGAP, F-34398 Montpellier, France

<sup>2</sup> International Rice Research Institute (IRRI), Crop and Environment Science Division (CESD), DAPO Box 7777 Metro Manila, Philippines

<sup>3</sup> Bayer CropScience NV, Innovation Center, Technologie park 38, B-9052 Gent, Belgium

\* To whom correspondence should be addressed. E-mail: [m.dingkuhn@irri.org](mailto:m.dingkuhn@irri.org)

Received 3 November 2014; Revised 5 March 2015; Accepted 25 March 2015

## Abstract

Global warming causes night temperature (NT) to increase faster than day temperature in the tropics. According to crop growth models, respiration incurs a loss of 40–60% of photosynthate. The thermal sensitivity of night respiration ( $R_n$ ) will thus reduce biomass. Instantaneous and acclimated effects of NT on  $R_n$  of leaves and seedlings of two rice cultivars having a variable level of carbohydrates, induced by exposure to different light intensity on the previous day, were investigated. Experiments were conducted in a greenhouse and growth chambers, with  $R_n$  measured on the youngest fully expanded leaves or whole seedlings. Dry weight-based  $R_n$  was 2.6-fold greater for seedlings than for leaves. Leaf  $R_n$  was linearly related to starch (positive intercept) and soluble sugar concentration (zero intercept). Increased NT caused higher  $R_n$  at a given carbohydrate concentration. The change of  $R_n$  at NT increasing from 21 °C to 31 °C was 2.4-fold for the instantaneous response but 1.2- to 1.7-fold after acclimation. The maintenance component of  $R_n$  ( $R_m'$ ), estimated by assimilate starvation, averaged 28% in seedlings and 34% in leaves, with no significant thermal effect on this ratio. The acclimated effect of increased NT on  $R_m'$  across experiments was 1.5-fold for a 10 °C increase in NT. No cultivar differences were observed in  $R_n$  or  $R_m'$  responses. The results suggest that the commonly used Q10=2 rule overestimates thermal response of respiration, and  $R_n$  largely depends on assimilate resources.

**Key words:** Acclimation, *Oryza sativa* L., maintenance and growth respiration, Q10, shading, soluble sugars, starch.

## Introduction

Mitochondrial respiration is an important component of plant and crop carbon balance and productivity, fuelling growth and maintenance processes (Penning de Vries, 1972; McCree, 1982; for a review, see Amthor, 2000). It is also a limiting factor for biomass production because it consumes a large fraction of available assimilates. While growth respiration ( $R_g$ ) is mainly determined by the quantity and chemical composition of the new biomass generated (McCree, 1970; Penning de Vries *et al.*, 1989), maintenance respiration ( $R_m$ ) covers the costs of keeping existing tissues functional (McCree, 1970; Thornley, 1970; Penning de Vries, 1975; Penning de Vries *et al.*, 1989). As such,  $R_m$  increases with the weight of

the organism and its metabolic activity, and is described as increasing exponentially with temperature (McCree, 1970). This has two important consequences: (i) non-woody plants can only attain a finite weight at which photosynthesis and the  $R_m$  burden break even; and (ii) at higher temperatures, such as those caused by global warming, the attainable biomass of crops becomes smaller.

Many studies confirmed that respiration rates ( $R$ ) increase under elevated night temperature (NT) in diverse species including *Heteromeles arbutifolia* and *Lepechinia fragans* (Villar *et al.*, 1995), soybean (Bunce, 2005; Frantz *et al.*, 2004), lettuce and tomato (Frantz *et al.*, 2004), and rice (Cheng

*et al.*, 2009; Kanno *et al.*, 2009; Kanno and Makino, 2010; Mohammed and Tarpley, 2010). Whether or not the yield decline reported by Peng *et al.* (2004), Nagarajan *et al.* (2010), and Welch *et al.* (2010) can be attributed to NT effects on  $R$  is unclear because many environmental variables vary along with NT and temperature effects on  $R$  do not always affect crop biomass (Peraudeau *et al.*, 2015). Crop biomass and yield may be unaffected by increased NT because it probably also affects other processes such as the photosynthetic rate which increased as reported for *Populus deltoides* (Turnbull *et al.*, 2002) and rice (Kanno *et al.*, 2009), or not, as reported for lettuce, tomato, and soybean (Frantz *et al.*, 2004), and rice (Mohammed and Tarpley, 2010); and plant phenology which is under thermal control and also affects productivity (Yin *et al.*, 1996).

Conditions that increase carbon assimilation and growth increase  $R$ . Indeed,  $R$  was reported to be positively correlated with soluble sugar (SS) and starch concentration in leaves of *Quercus rubra* (Whitehead *et al.*, 2004) and wheat (Azcon-Bieto and Osmond, 1983). Dark or night  $R$  are thus, at least in part, driven by assimilate availability, but it is unclear to what extent this reflects the energy demand for stimulating growth ( $R_g$ ) when resources abound, or wasteful respiration directly caused by substrate abundance (Thornley, 1971). Night respiration ( $R_n$ ) of crop canopies was reported to be proportional to canopy nitrogen content, the linear correlation being the same for several developmental stages and agronomic practices (Ingram *et al.*, 1991). Nitrogen is also the driver of photosynthetic potential (Archontoulis *et al.*, 2011). No such generic correlation was found between  $R_n$  and plant dry matter, indicating that  $R_n$  is a function of metabolic activity rather than of biomass *per se*.

Physiological plant models (e.g. ORYZA 2000; Bouman *et al.*, 2001) divide respiration into  $R_g$  and  $R_m$ , where  $R_g$  is not directly driven by temperature because it depends on growth and, ultimately, resource acquisition. According to van Iersel and Seymour (2000), 1.39 g of glucose is needed to produce 1 g of non-lignified plant dry weight, involving 28% loss of the assimilate invested through  $R_g$ , regardless of temperature. In contrast,  $R_m$ , which is required to maintain ionic gradients, turnover of membrane components, and molecular housekeeping within cells (Penning de Vries, 1975), increases exponentially with temperature according to  $Q_{10}=2$ , resulting in doubling in  $R_m$  for each 10 °C increase in temperature (Atkin and Tjoelker, 2003). The instantaneous (without acclimation to temperature) exponential response of  $R$  to temperature was reported to be valid for large temperature ranges, namely from 5 °C to ~50 °C in *Eucalyptus pauciflora* (O'Sullivan *et al.*, 2013) or 10 °C to 35 °C in semi-arid temperate steppe (Chi *et al.*, 2013). However, in the context of global warming increasing NT faster than day temperature (IPCC, 2013), changes in NT predicted by climate models for South East Asia (Chotamonsak *et al.*, 2011) are much smaller than these temperature ranges, and NT evolution involves acclimation because it is long term. Such effects on  $R$  are not well known. For rapid temperature changes,  $Q_{10}$  equals ~2 within the range of the species' thermal adaptation (Yoshida, 1981; Penning de Vries *et al.*, 1989; Bouman

*et al.*, 2001), but is smaller under hot conditions (Yoshida, 1981; Atkin and Tjoelker, 2003). Other studies reported that after acclimation,  $Q_{10}$  for  $R$  dropped to between 1.35 and 1.55 in *Tagetes patula* (van Iersel, 2006) and to 1.77 for semi-arid temperate steppe (Chi *et al.*, 2013), compared with values >2 without acclimation. Atkin and Tjoelker (2003) proposed two acclimation types for  $R$  to temperature. In Type I,  $R$  is constant at low temperature ranges regardless of growth temperature and responds to higher temperatures with a lower  $Q_{10}$  if plants are acclimated to them. In Type II,  $R$  is lower for warm-acclimated plants regardless of the temperature studied and  $Q_{10}$  does not necessarily change with growth temperature. The temperature dependency of  $R$  might thus be subjected to a moderating acclimation effect, but information is too limited to generalize. For lack of better evidence, many crop models use the  $Q_{10}=2$  paradigm for acclimated  $R_m$ , although it may give inaccurate predictions of the impact of global warming.

The objectives of this study were to characterize (i) instantaneous and acclimated effects of NT on  $R_n$  of rice leaves and whole seedlings under non-limiting water and nitrogen supply; and (ii) interactions of  $R_n$  with assimilate resources resulting from differential illumination on the day preceding measurement of  $R_n$ . Furthermore, an attempt was made to (iii) estimate the  $R_m$  component of  $R_n$ , considered to be equal to  $R$  when photosynthesis of the previous day approaches zero. The work was conducted in thermally controlled environments. The purpose was to provide information that may help in improving rice crop models that simulate  $R$  but face uncertainty on thermal response.

## Materials and methods

The two cultivars (N22 and an indica rice hybrid) studied are different in terms of architecture (N22 is taller), growth duration (longer for the hybrid), and yield potential (greater for the hybrid) (Peraudeau *et al.*, 2015). Furthermore, N22 is heat tolerant (Prasad *et al.* 2006; Jagadish *et al.*, 2008). Cultivars were grown in three experiments. A greenhouse experiment (GH) was conducted in 2013 at CNRS, Montpellier (43°38'N, 3°51'E), France. Two artificially lit controlled-environment chamber experiments were carried out, one in 2013 (GC1) at the International Rice Research Institute (IRRI), Los Baños, Philippines and the second in 2014 (GC2) at the Agricultural Research Center for International Development (CIRAD), Montpellier, France.

### Plant management

In GH and in GC2, seed dormancy was broken by exposure to 29 °C for 4 d. Pre-germinated seed was sown at two seedlings per pot and thinned to one plant after 1 week. Pots were arranged in flat basins with 5 cm water maintained throughout the experiment, plants being irrigated by capillarity. In GH, four tables were used per compartment, each containing 84 pots (3 litres). The tables were moved and re-oriented twice a week to control heterogeneity effects. In GC2, one table containing 150 pots (1 litre) was used. Pots were randomly rearranged three times a week to control chamber heterogeneity. In both GH and GC2, the commercial soil EGO 140 (17N-10P-14K, pH 5, Jiffy International AS, Norway) was used. In GH, Basacot 6 M+ (2g l<sup>-1</sup>, 11N-9P-19K+2Mg, Compo, Germany) was added and incorporated before planting. Foliar manganese (2%) was applied whenever deficiency appeared.

In GC1, seed dormancy was broken by exposure to 50 °C for 3 d, followed by pre-germination and sowing in seedling trays. Fourteen-day-old seedlings were transplanted at one seedling per pot (7 litres) filled with clay loam soil and maintained in a greenhouse. Basal fertilizer was applied at 2-1-1 g of N-P-K per pot. Topdressing was done at 2.5 g pot<sup>-1</sup> ammonium sulphate. Pots were flooded with 2 cm of water throughout the experiment. On 1 April 2013, pots were moved to controlled environments. Pots were frequently rearranged to control heterogeneity effects.

In the three experiments, nitrogen was not limiting, as confirmed by a chlorophyll meter (SPAD-502, Konica Minolta, Japan) (GH and GC1) or Kjeldahl analysis of leaf nitrogen content (GC2). The SPAD (Soil Plant Analysis Development) value in GH was 33 ± 2 (mean ± SD) for the hybrid and N22, and in GC1 it was 41 ± 2 for the hybrid and 38 ± 2 for N22. In GC2, seedling nitrogen content was 4.9 ± 0.4% (g g<sup>-1</sup>) for the hybrid and 4.6 ± 0.3% (g g<sup>-1</sup>) for N22.

#### Temperature treatments and relative humidity

In GH, two naturally lit independent compartments were used (6.2 m × 6.2 m). Temperature was controlled continuously at 29 °C during the day, and 21 °C (control,  $T_C$ ) or 26 °C (increased NT,  $T_I$ ) at night.

In GC2, the same artificially lit compartment was used three times consecutively, namely from 25 March 2014 to 11 April 2014 for  $T_C$ , from 14 April 2014 to 2 May 2014 for  $T_I$ , and from 5 May 2014 to 22 May 2014 for high NT ( $T_H$ ). Temperature treatments were 29 °C during the day, and 21, 25, and 29 °C at night for  $T_C$ ,  $T_I$  and  $T_H$ , respectively.

In both GH and GC2, actual air temperature was measured with a PT1000 probe (Campbell Scientific, Logan, UT, USA) combined with a fan-cooled shield. Relative humidity was measured with an MP100 probe (Rotronic, Switzerland). Both probes were connected to a CR1000 data logger (Campbell Scientific).

In GC1, two artificially lit controlled-environment compartments were used simultaneously (3 m × 3 m). Air temperature was controlled at 29 °C during the day, and 21 °C ( $T_C$ ) and 26 °C ( $T_I$ ) at night. Plants were transferred from a greenhouse to these environments at 32 d (hybrid) or 38 d (N22)s after sowing and then grew there continuously. Actual air temperature and relative humidity were measured with a MINCER (Micrometeorological Instrument for Near Canopy Environment of Rice, developed by the National Institute of Agrobiological Sciences, Japan; Yoshimoto *et al.*, 2012).

For the three experiments, the actual air temperature, relative humidity, and vapour pressure deficit (VPD) are presented in Table 1. The VPD was calculated based on the equation published by the Food and Agriculture Organization of the United Nations (Allen *et al.*, 1998).

#### Light treatments

In GH, photosynthetically active radiation (PAR) measured at canopy level with PAR sensors (SKP215, Campbell Scientific) was 26.0 mol m<sup>-2</sup> d<sup>-1</sup> (Table 1). During each day preceding the nights when  $R_n$  was measured, three light treatments were implemented, one control (PAR<sub>C</sub> for control, 100%) and two using mosquito nets reducing incident PAR to 30% (PAR<sub>M</sub>, medium shading) and 12% (PAR<sub>S</sub>, severe shading) (Table 2).

In GC1, average PAR measured at canopy level with PAR sensors (3415FXSE Spectrum® Technologies, Inc.) was 17.3 mol m<sup>-2</sup> d<sup>-1</sup> (Table 1). During each day before the nights when  $R_n$  was measured, two light treatments were implemented, control (PAR<sub>C</sub>, 100%) and mosquito nets reducing incident PAR to 4% (PAR<sub>S</sub>) (Table 2).

In GC2, average PAR measured at canopy level with PAR sensors (SKP215, Campbell Scientific) was 22.2 mol m<sup>-2</sup> d<sup>-1</sup> (Table 1). During each day before the nights when  $R_n$  was measured, four light treatments were implemented, one control (PAR<sub>C</sub>, 100%) and three using mosquito nets reducing incident PAR to 51% (PAR<sub>L</sub>, low shading), 12% (PAR<sub>S</sub>), and 0% (PAR<sub>N</sub>, no light) (Table 2).

#### Gas exchange measurements

Leaf  $R_n$  measurements were performed during the night-time, at least 1 h after sunset or light extinction, with a gas analyser GFS-3000 (model 3000-C or 3100-C, Walz, Germany) combined with a gas exchange chamber 3010-GWK1 (Walz, Germany). The last fully expanded leaf was chosen to measure  $R_n$ , except in GC2 where the whole seedling was inserted in the chamber, designed with a large area for leaf measurement (14 cm × 10 cm) to minimize signal noise by reducing air leakage and exposing a large leaf area. The temperature in the chamber was controlled at 21, 25, 26, or 29 °C according to the temperature treatment. Humidity was set to obtain a VPD of 1.2 kPa. Air flow and fan speed were optimized to avoid condensation and minimize noise (air flow ~1100 μmol s<sup>-1</sup>). The time until stability of readings was reached was 6–15 min.

Respiration measurements were performed at different plant ages. Two sets of leaf respiration measurements in GH and GC1, and one set in GC2, were conducted for each temperature treatment. The period of  $R_n$  measurements is presented in Table 3.

Immediate temperature responses of  $R_n$  (temperature response curve) were performed: (i) in GH, 61–64 days after sowing (DAS) for the hybrid [2–5 d before panicle initiation (PI)] and 53–56 DAS for N22 (10–13 d after PI); and (ii) in GC1, 82 and 83 DAS for the hybrid (7 d and 8 d after PI) and 74 and 75 DAS for N22 (1 d and 2 d before flowering).

Ascending steps by 3 °C were used between 19 °C and 31 °C. Before and after this series of measurements, the leaf was exposed to 22 °C until steady state was observed, and  $R_n$  measured. This

**Table 1.** Climatic data of experiments in the greenhouse (GH) in France, growth chambers (GC1) in the Philippines, and growth chambers in France (GC2)

| Experiment | Year | Temperature treatment | PAR (mol m <sup>-2</sup> d <sup>-1</sup> ) | Average temperature |            |      | Relative humidity Day (%) | VPD (kPa) |
|------------|------|-----------------------|--------------------------------------------|---------------------|------------|------|---------------------------|-----------|
|            |      |                       |                                            | Day (°C)            | Night (°C) | ΔT°C |                           |           |
| GH         | 2013 | $T_C$                 | 26.0 ± 9.1                                 | 29.1 ± 0.3          | 21.4 ± 1.4 |      | 63 ± 11                   | 1.1 ± 0.4 |
|            |      | $T_I$                 |                                            | 29.3 ± 0.7          | 26.5 ± 0.5 | +5.1 | 56 ± 9                    | 1.6 ± 0.3 |
| GC1        | 2013 | $T_C$                 | 17.3 ± 0.0                                 | 27.0 ± 0.2          | 21.1 ± 0.1 |      | 78 ± 1                    | 0.8 ± 0.1 |
|            |      | $T_I$                 |                                            | 26.3 ± 0.2          | 24.7 ± 0.0 | +3.6 | 79 ± 1                    | 0.7 ± 0.1 |
| GC2        | 2014 | $T_C$                 | 22.2 ± 3.7                                 | 28.9 ± 0.2          | 21.4 ± 0.1 |      | 73 ± 3                    | 0.7 ± 0.1 |
|            |      | $T_I$                 |                                            | 28.8 ± 0.5          | 24.9 ± 0.3 | +3.5 | 77 ± 2                    | 0.6 ± 0.1 |
|            |      | $T_H$                 |                                            | 28.5 ± 0.3          | 29.0 ± 0.7 | +7.6 | 72 ± 2                    | 0.7 ± 0.1 |

Treatments:  $T_C$ , control temperature;  $T_I$ , increased night temperature;  $T_H$ , high night temperature; ΔT°C, average difference between night temperature in  $T_I$  or  $T_H$  and  $T_C$ . PAR, photosynthetic active radiation; VPD, vapour pressure deficit. Mean values ± SD.

**Table 2.** Average PAR at plant tops during the day before night respiration measurements in the greenhouse in France (GH), growth chambers at IIRRI in the Philippines (GC1), and growth chambers in France (GC2)

| Experiment | Cultivar       | Time to measurement      | Temperature treatment | Light treatment (mol m <sup>-2</sup> d <sup>-1</sup> ) |                  |                  |                  |                  |
|------------|----------------|--------------------------|-----------------------|--------------------------------------------------------|------------------|------------------|------------------|------------------|
|            |                |                          |                       | PAR <sub>C</sub>                                       | PAR <sub>L</sub> | PAR <sub>M</sub> | PAR <sub>S</sub> | PAR <sub>N</sub> |
| GH         | Hybrid         | 55 DAS                   | T <sub>C</sub>        | 33.8±0.5                                               | –                | 10.3±0.2         | 4.4±0.1          | –                |
|            |                |                          | T <sub>I</sub>        | 33.8±0.5                                               | –                | 9.7±0.2          | 3.6±0.1          | –                |
|            | 83 DAS         | T <sub>C</sub>           | 25.4±4.9              | –                                                      | 7.7±1.5          | 3.3±0.6          | –                |                  |
|            |                | T <sub>I</sub>           | 25.4±4.9              | –                                                      | 7.3±1.4          | 2.7±0.5          | –                |                  |
|            | N22            | 47 DAS                   | T <sub>C</sub>        | 29.6±2.6                                               | –                | 9.0±0.8          | 3.8±0.3          | –                |
|            |                |                          | T <sub>I</sub>        | 29.6±2.6                                               | –                | 8.5±0.7          | 3.1±0.3          | –                |
| 75 DAS     | T <sub>C</sub> | 22.7±10.4                | –                     | 6.9±3.2                                                | 6.5±3.0          | –                |                  |                  |
|            | T <sub>I</sub> | 22.7±10.4                | –                     | 3.0±1.4                                                | 2.4±1.1          | –                |                  |                  |
| GC1        | Both cultivars | Both set of measurements | T <sub>C</sub>        | 25.7±0.0                                               | –                | –                | 1.0±0.0          | –                |
|            |                |                          | T <sub>I</sub>        | 27.2±0.0                                               | –                | –                | 1.0±0.0          | –                |
| GC2        | Both cultivars | Seedling                 | Three treatments      | 29.2±0.0                                               | 14.9±0.0         | –                | 3.6±0.0          | 0.0±0.0          |

T<sub>C</sub>, control temperature; T<sub>I</sub>, increased night temperature; T<sub>H</sub>, high night temperature; PAR<sub>C</sub> (100%); PAR<sub>L</sub> (51%); PAR<sub>M</sub> (30%); PAR<sub>S</sub> (12% in GH and GC2; 4% in GC1); PAR<sub>N</sub> (0%). Mean values ±SD.

**Table 3.** Identification of series of measurements, days after sowing for measurements (DAS), and physiological stage when respiration measurements were performed

| Experiment | Cultivar       | Identification | DAS   | Physiological stage        |
|------------|----------------|----------------|-------|----------------------------|
| GH         | Hybrid         | 55 DAS         | 54–57 | 9–12 d before PI           |
|            |                | 83 DAS         | 82–85 | 13–16 d before flowering   |
|            | N22            | 47 DAS         | 46–49 | 3–6 d before PI            |
|            |                | 75 DAS         | 74–77 | 1–4 d after flowering      |
| GC1        | Hybrid         | 49 DAS         | 47–52 | 23–28 d before PI          |
|            |                | 75 DAS         | 70–79 | 5 d before to 4 d after PI |
|            | N22            | 49DAS          | 47–52 | 4 d before to 1 d after PI |
|            |                | 66 DAS         | 61–71 | 5–15 d before flowering    |
| GC2        | Both cultivars | 22 DAS         | 18–22 | Seedling stage             |

PI, panicle initiation.

standard procedure was applied to all plants regardless of NT treatment. Respiration rates observed at 22 °C before and after the temperature response measurements were not significantly different.

For GH and GC1, leaf area-based  $R_n$  was converted into leaf dry matter-based  $R_n$  using measurements of specific leaf area (SLA) of the same portion of the leaf.

In GC2,  $R_n$  of whole seedlings was measured on a dry matter basis only, as the leaf area had not been measured.

#### Non-structural carbohydrate analysis

Two different techniques were used to analyse the non-structural carbohydrate (NSC) content, according to the facilities available for GC1 at IIRRI (Philippines) and for GH at CIRAD (France).

In GC1, leaf samples were treated with a heat burst in a microwave for 1 min (Pelletier *et al.*, 2010) to stop enzymatic reactions and then dried at 70 °C for 48 h. In GH, leaf samples were submersed in liquid nitrogen, conserved at –30 °C, and then freeze-dried. In both experiments, leaf samples were ground finely before NSC extraction.

In GC1, 10 mg of dry powder was extracted three times with 0.7 ml of ethanol (80% v/v) for 10 min at 80–85 °C. The supernatant after each extraction was recovered by centrifugation. After the last extraction, the pellet was washed with 0.5 ml of 80% ethanol. All

supernatants were transferred to a test tube and the combined volume was adjusted to 2.5 ml with 80% ethanol. SS content was determined by a colorimetric method with anthrone reagent (Yoshida *et al.*, 1976). The remaining ethanol-insoluble residue was dried at 70 °C for 24 h. Then, 0.2 ml of water was added and the tube was placed in a boiling water bath for 15 min. After cooling, 0.2 ml of 9.2 N HClO<sub>4</sub> was added. The solution was stirred occasionally for 15 min, and the suspension adjusted to a volume of 0.6 ml with water, and centrifuged for 10 min at 3000 rpm. The supernatant was transferred to a test tube and 0.2 ml of 4.6 N HClO<sub>4</sub> was added. These steps were repeated twice, the residue washed with 0.5 ml of water, the supernatants combined, and the volume adjusted to 5 ml with water. The glucose content, equivalent to the starch content before hydrolysis, was measured by a colorimetric method with anthrone reagent (Yoshida *et al.*, 1976).

In GH, 20 mg of dry powder was extracted three times with 1 ml of ethanol for 30 min at 75 °C. After each extraction the supernatant was recovered by centrifugation (10 min, 10 000 rpm) and transferred to a test tube. Then, 0.5 ml of ethanol (80% v/v) was added to the remaining ethanol-insoluble residue and stored at –30 °C. Combined supernatants were filtered through a column composed of 50 mg of polyvinyl pyrrolidone and 50 mg of activated charcoal prepared in 80% ethanol. After filtration, the column was washed with 1 ml of ethanol (80%). Ethanol of the filtrate was evaporated and 1 ml of distilled water added to dissolve the dry residue. Quantification of SSs was done by high-performance anion exchange chromatography with pulsed amperometric detection (HPAEC). Tubes containing the ethanol-insoluble residue were thawed and centrifuged (5 min, 10 000 rpm). Supernatants were discarded and the pellets solubilized using 1 ml of 0.02 N NaOH solution at 90 °C for 90 min and stirred every 30 min. Starch was hydrolysed to glucose by addition of 100 µl of amyloglucosidase (5 mg ml<sup>-1</sup>) solution and incubated at 50 °C for 90 min. Glucose was quantified by enzymatic assay with hexokinase/glucose-6-phosphate dehydrogenase (Bergmeyer *et al.*, 1974).

#### Statistical analysis

The significance of the effect of cultivar (C), temperature (T), and light (L) treatments on leaf respiration, leaf starch content, and leaf SS content was analysed using a two- or three-way analysis of variance (ANOVA) with R (version 2.15.2, R Foundation for Statistical

Computing). Where requirements for ANOVA were not satisfied, especially for residual normality, the non-parametric test of Kruskal and Wallis was performed using the same software.

## Results

### Relationship between leaf respiration rate and leaf starch or soluble sugar content

Leaf night respiration rate was significantly, positively, linearly correlated with leaf starch and SS content in GH at 55 DAS for the hybrid and 47 DAS for N22 (Fig. 1). Correlations were significant at  $P < 0.001$  (Pearson's test), except for N22 for  $T_C$  with  $P < 0.01$  (starch) and  $P < 0.05$  (SS) (Table 4). Similar results were observed in GH at 75 DAS for N22 (the hybrid was non-significant at 83 DAS) and in GC1 for both cultivars (data not shown). Thus, there was a consistent pattern of  $R_n$  being proportional to leaf starch and SS concentration across developmental stages, experiments, and treatments, although slopes of the correlation varied (Table 4).

In all cases, decreased light intensity during the day before  $R_n$  measurement caused a decrease in leaf starch and SS content that was about proportional to the decrease in  $R_n$  (Fig. 1A–D). The correlations observed between  $R_n$  and starch or SS were greater for the hybrid ( $r^2 = 0.75$  for  $R_n$  versus starch and 0.62 for  $R_n$  versus SS) than for N22 ( $r^2 = 0.51$  for  $R_n$  versus starch and 0.40 for  $R_n$  versus SS). The correlations observed between  $R_n$  and starch was greater than those

between  $R_n$  and SS for both genotypes (Fig. 1; details of statistics in Table 4).

The slope of the correlations between  $R_n$  and starch or SS across the different levels of the previous day's light was greater under  $T_1$  than under  $T_C$  (Fig. 1E–H; Table 4). In all cases, slopes and determination coefficients were greater under  $T_1$  than under  $T_C$  for both cultivars, in both GH and GC1 experiments. Consequently, higher temperatures increased the leaf respiration rate per unit of leaf starch or SS concentration.

### Effect of previous day's radiation level and night temperature on leaf respiration rate

Leaf (GH and GC1) and whole seedling (GC2)  $R_n$  were significantly lower when plants were exposed to low light during the day before  $R_n$  measurement, for both cultivars ( $P < 0.001$ ; Figs 2, 3; Table 5).

### GH experiment, hybrid

At 55 DAS,  $R_n$  of the hybrid was significantly lower for  $PAR_M$  and  $PAR_S$  than for  $PAR_C$  ( $P < 0.05$ ; Fig. 2; Table 5). A significant interaction between light and temperature on  $R_n$  was found ( $P < 0.01$ ). Thus,  $R_n$  for  $PAR_C$  under  $T_1$  was significantly greater than under  $T_C$  ( $P < 0.05$ ), whereas for  $PAR_M$  and  $PAR_S$  no significant differences were observed among temperature treatments. At 83 DAS,  $R_n$  was significantly lower for  $PAR_S$  than for  $PAR_C$ , but no significant difference was observed under  $T_1$  between  $PAR_C$  and  $PAR_M$  (Table 5). The  $R_n$  was

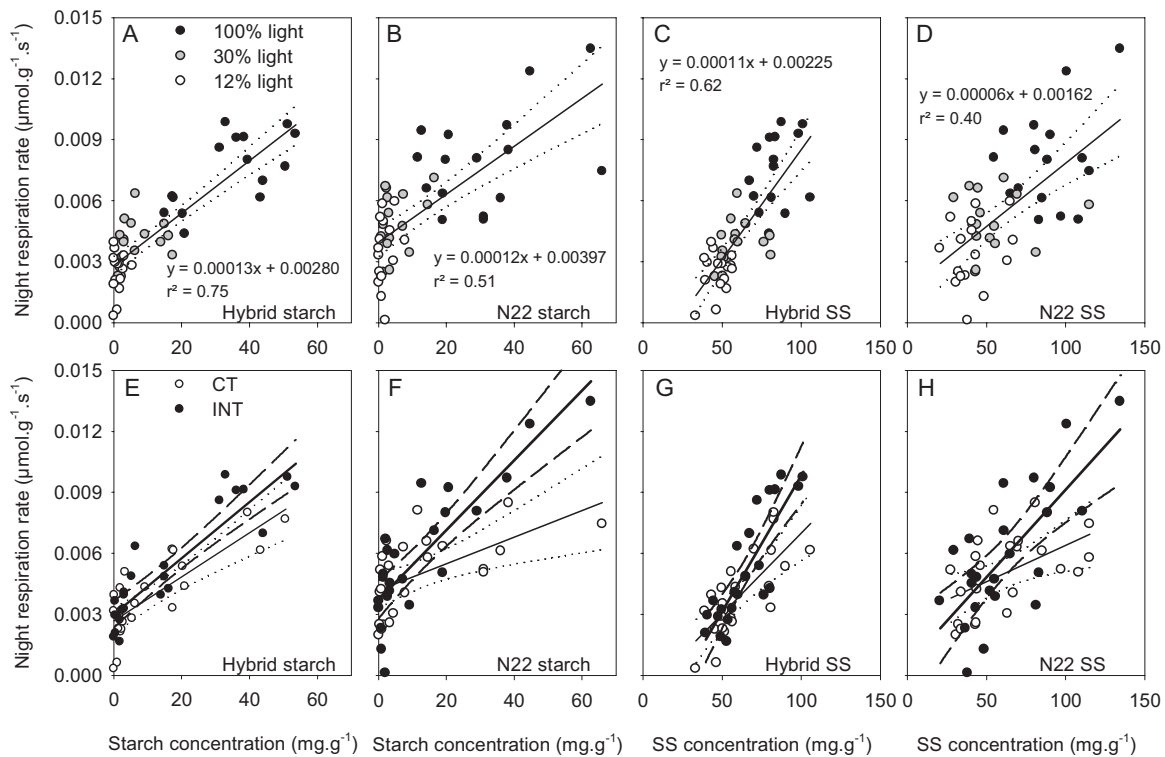

**Fig. 1.** Leaf night respiration rate in relation to starch (A–F) and SS (soluble sugar; C–H) concentrations for the hybrid (A, C, E, G) and N22 (B, D, F, H) rice cultivars at 55 DAS and 47 DAS, respectively, in the GH experiment. Upper four graphs: observations grouped by light treatments with 100%, full light (black symbols); 30%, intermediate shading (grey); and 12%, severe shading (white). Dotted lines represent the confidence interval of linear regression (95%). Lower four graphs: observations grouped by temperature treatment with  $T_C$ , control at 21 °C (white symbols); and  $T_1$ , increased night temperature at 26 °C (black). Linear regression lines are shown for  $T_C$  and  $T_1$  treatments.

**Table 4.** Coefficients of linear regressions ( $y=ax+b$ ) between leaf respiration rate and starch or soluble sugar content

| Cultivar   | Code   | Starch or soluble sugar | Temperature | No. of measurements | Linear regression $y=ax+b$ |          |                       | Significance |
|------------|--------|-------------------------|-------------|---------------------|----------------------------|----------|-----------------------|--------------|
|            |        |                         |             |                     | <i>a</i>                   | <i>b</i> | <i>r</i> <sup>2</sup> |              |
| GH Hybrid  | 55 DAS | Starch                  | $T_C$       | 23                  | 1.1E-04                    | 2.7E-03  | 0.65                  | ***          |
|            |        |                         | $T_I$       | 24                  | 1.4E-04                    | 3.0E-03  | 0.82                  | ***          |
|            |        | Soluble sugar           | $T_C$       | 23                  | 0.8E-04                    | -1.0E-03 | 0.56                  | ***          |
|            |        |                         | $T_I$       | 24                  | 1.3E-04                    | -3.5E-03 | 0.72                  | ***          |
| N22        | 47 DAS | Starch                  | $T_C$       | 23                  | 0.7E-04                    | 4.2E-03  | 0.34                  | **           |
|            |        |                         | $T_I$       | 24                  | 1.7E-04                    | 3.7E-03  | 0.73                  | ***          |
|            |        | Soluble sugar           | $T_C$       | 23                  | 0.4E-04                    | 2.8E-03  | 0.26                  | *            |
|            |        |                         | $T_I$       | 24                  | 0.9E-04                    | 0.6E-03  | 0.54                  | ***          |
| GC1 Hybrid | 75 DAS | Starch                  | $T_C$       | 24                  | 3.9E-04                    | 0.7E-03  | 0.45                  | ***          |
|            |        |                         | $T_I$       | 24                  | 4.4E-04                    | 1.4E-03  | 0.48                  | ***          |
|            |        | Soluble sugar           | $T_C$       | 24                  | 1.7E-04                    | 0.2E-03  | 0.44                  | ***          |
|            |        |                         | $T_I$       | 24                  | 3.6E-04                    | -1.4E-03 | 0.63                  | ***          |
| N22        | 66 DAS | Starch                  | $T_C$       | 24                  | 3.5E-04                    | 1.7E-03  | 0.46                  | ***          |
|            |        |                         | $T_I$       | 24                  | 4.4E-04                    | 2.3E-03  | 0.47                  | ***          |
|            |        | Soluble sugar           | $T_C$       | 24                  | 2.1E-04                    | 1.3E-03  | 0.53                  | ***          |
|            |        |                         | $T_I$       | 24                  | 4.0E-04                    | -0.3E-03 | 0.60                  | ***          |

$T_C$ , control temperature;  $T_I$ , increased night temperature;  $T_H$ , high night temperature. Level of significance is expressed as \*, \*\*, \*\*\*, for  $P<0.05$ ,  $P<0.01$ , and  $P<0.001$ , respectively.

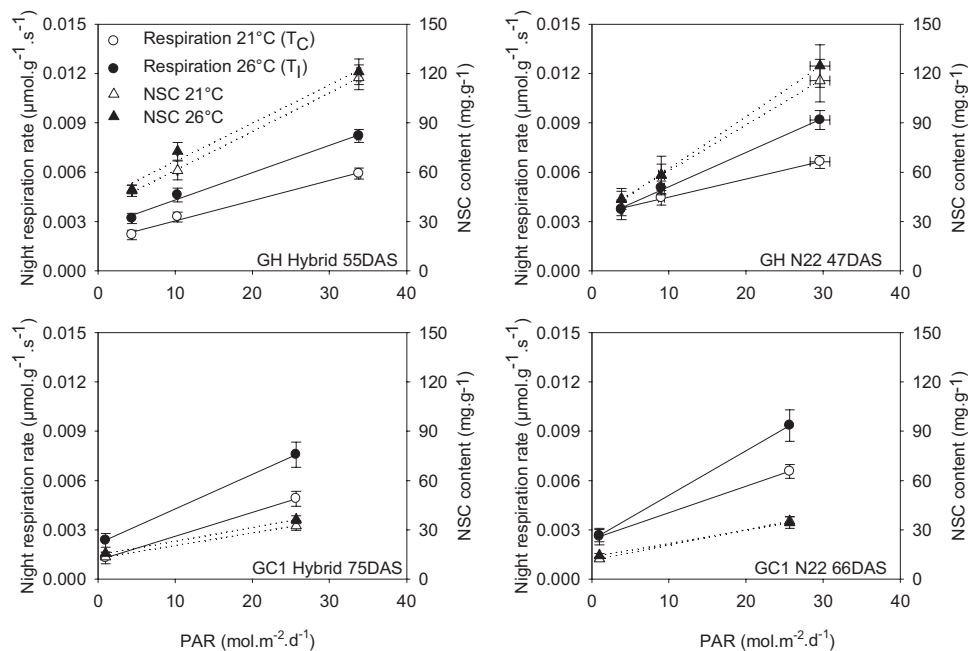

**Fig. 2.** Relationship between leaf night respiration rate (circles) and non-structural carbohydrates (NSC, triangles) versus PAR (photosynthetically active radiation) for the hybrid and N22 rice cultivars grown under 21 °C (open symbols) or 26 °C (filled symbols) night temperature. Upper graphs: the GH experiment at 55 DAS for the hybrid and 47 DAS for N22. Bottom: the GC1 experiment at 75 DAS for the hybrid and 66 DAS for N22. Error bars=SE of 16 measurements for the hybrid and 13 for N22 in GH; and 12 measurements in GC1. Error bars of NSC=SE of 8 measurements (GH) and 12 measurements (GC1).

significantly greater under  $T_I$  than under  $T_C$  for  $PAR_C$  and  $PAR_M$  light treatments ( $P<0.05$ ).

#### GH experiment, cv. N22

Similar to the hybrid, at 47 DAS, N22 showed a significantly lower  $R_n$  for  $PAR_M$  and  $PAR_S$  than for  $PAR_C$  ( $P<0.05$ ), and a

higher  $R_n$  under  $T_I$  than under  $T_C$  for  $PAR_C$  only (interaction light $\times$ temperature) (Fig. 2; Table 5). At 75 DAS,  $R_n$  of N22 was significantly lower for  $PAR_S$  than for  $PAR_C$ , and no significant difference was observed under  $T_C$  between  $PAR_C$  and  $PAR_M$  (Table 5). However, unlike for the hybrid, no significant difference of  $R_n$  was observed between the NT treatments for

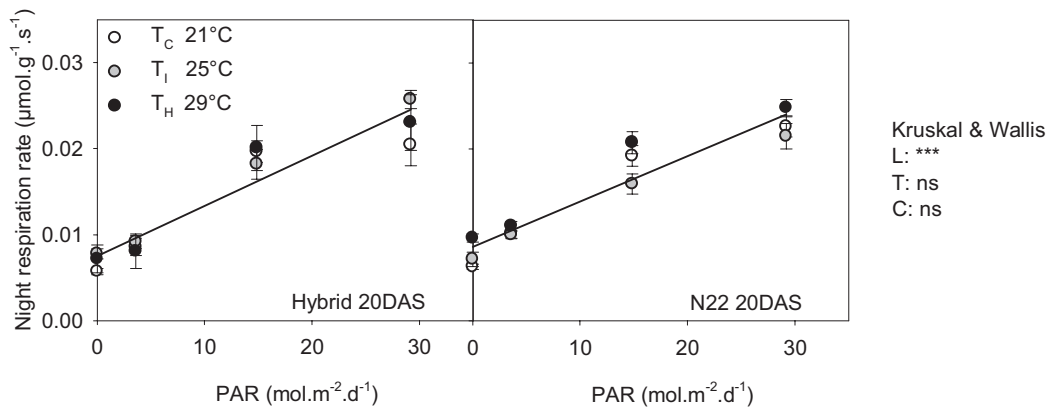

**Fig. 3.** Relationship of night respiration rate on whole seedlings versus PAR (photosynthetically active radiation) for the hybrid and N22 rice cultivars grown under 21 °C (white symbols), 25 °C (grey), or 29 °C (black) night temperature.  $T_C$ , control temperature;  $T_I$ , increased night temperature;  $T_H$ , high night temperature. Different light treatments during the previous day:  $PAR_C$  (100%);  $PAR_L$  (51%);  $PAR_M$  (30%);  $PAR_S$  (12%);  $PAR_N$  (0%). Level of significance is expressed as \*, \*\*, \*\*\*, and ns for  $P < 0.05$ ,  $P < 0.01$ ,  $P < 0.001$ , and  $P > 0.05$ , respectively, using Kruskal and Wallis non-parametric test. Error bars=SE of 6 measurements.

**Table 5.** Results of three-way ANOVA for the factors light treatment (L), night temperature treatment (T), and cultivar (C) on night respiration rate ( $R_n$ ) and leaf non-structural carbohydrate (NSC) content

| Experiment/series of measurement |       |     |     |     |     |     |     |       |         | Hybrid          |       | N22          |       |
|----------------------------------|-------|-----|-----|-----|-----|-----|-----|-------|---------|-----------------|-------|--------------|-------|
| GH                               |       | L   | T   | C   | L×T | C×T | L×C | L×C×T |         | $T_C$           | $T_I$ | $T_C$        | $T_I$ |
| 55 DAS hybrid                    | $R_n$ | *** | *** | *** | **  | NS  | NS  | NS    | $PAR_C$ | cd              | ab    | bc           | a     |
| 47 DAS N22                       |       |     |     |     |     |     |     |       | $PAR_M$ | ef              | de    | de           | cde   |
|                                  |       |     |     |     |     |     |     |       | $PAR_S$ | f               | ef    | ef           | ef    |
| GH                               | NSC   | *** | NS  | *   | NS  | NS  | NS  | NS    | $PAR_C$ | a               | a     | ab           | a     |
| 83 DAS Hybrid                    |       |     |     |     |     |     |     |       | $PAR_M$ | cd              | bc    | cd           | cd    |
| 75 DAS N22                       |       |     |     |     |     |     |     |       | $PAR_S$ | cd              | cd    | d            | d     |
|                                  | $R_n$ | *** | *   | NS  | NS  | *** | NS  | NS    | $PAR_C$ | bcd             | a     | ab           | ab    |
|                                  |       |     |     |     |     |     |     |       | $PAR_M$ | e               | abc   | bcde         | de    |
|                                  |       |     |     |     |     |     |     |       | $PAR_S$ | e               | bcde  | cde          | e     |
|                                  | NSC   | *** | NS  | *** | NS  | NS  | NS  | NS    | $PAR_C$ | a               | a     | bcde         | abcd  |
|                                  |       |     |     |     |     |     |     |       | $PAR_M$ | ab              | a     | def          | cdef  |
|                                  |       |     |     |     |     |     |     |       | $PAR_S$ | ab              | abc   | ef           | f     |
| GC1                              |       | L   | T   | C   | L×T | C×T | L×C | L×C×T |         | Hybrid<br>$T_C$ | $T_I$ | N22<br>$T_C$ | $T_I$ |
| 49 DAS hybrid                    | $R_n$ | *** | NS  | NS  | /   | /   | /   | /     | $PAR_C$ | /               | /     | /            | /     |
| 49 DAS N22                       |       |     |     |     |     |     |     |       | $PAR_S$ | /               | /     | /            | /     |
| GH                               | NSC   | *** | NS  | NS  | NS  | NS  | NS  | NS    | $PAR_C$ | a               | a     | a            | a     |
| 75 DAS Hybrid                    |       |     |     |     |     |     |     |       | $PAR_S$ | b               | b     | b            | b     |
| 66 DAS N22                       | $R_n$ | *** | *** | **  | **  | NS  | NS  | NS    | $PAR_C$ | cd              | ab    | bc           | a     |
|                                  |       |     |     |     |     |     |     |       | $PAR_S$ | e               | e     | de           | de    |
|                                  | NSC   | *** | NS  | NS  | NS  | NS  | NS  | NS    | $PAR_C$ | a               | a     | a            | a     |
|                                  |       |     |     |     |     |     |     |       | $PAR_S$ | b               | b     | b            | b     |

$T_C$ , control temperature;  $T_I$ , increased night temperature;  $T_H$ , high night temperature.

Plants were grown under three intensities of light during the day preceding  $R_n$ :  $PAR_C$  (100%);  $PAR_M$  (30%);  $PAR_S$  (12% in GH and 4% in GC1).

Annotations \*, \*\*, \*\*\*, and NS stand for  $P < 0.05$ ,  $P < 0.01$ ,  $P < 0.001$ , and  $P > 0.05$ , respectively.

Different lower case letters show significant difference ( $P < 0.05$ ) according to post-hoc testing of Tukey-HSD.

'/' stands for 'unknown' in cases where normality of residue of ANOVA was not observed.

N22 ( $P > 0.05$ ), resulting in a significant interaction between temperature and cultivar ( $P < 0.001$ ; Table 5).

#### GC1 experiment, hybrid

Results at 75 DAS were similar to those of the GH experiment, but at 49 DAS no significant temperature effect

on  $R_n$  was observed. At both temperatures, significantly lower  $R_n$  was observed for  $PAR_S$  than for  $PAR_C$  (at 75 DAS, Tukey HSD post-hoc test,  $P < 0.05$ ; Table 5). At 75 DAS,  $R_n$  was significantly higher under  $T_I$  than under  $T_C$  ( $P < 0.05$ ) for  $PAR_C$  only, resulting in an interaction light×temperature.

*GC1 experiment, cv. N22*

Compared with the hybrid, N22 showed similar results with a significant decrease in  $R_n$  for  $PAR_S$  (at 49 and 66 DAS) and a significant increase in  $R_n$  under  $T_1$  for  $PAR_C$  only at 66 DAS (Fig. 2; Table 5).

*GC2 experiment: whole-plant light response of  $R_n$* 

Four light level treatments, including zero light on the day preceding  $R_n$  measurement, were applied to whole seedlings acclimated to three NTs (Fig. 3). The response was linear and near-identical between cultivars and also near-identical among temperature levels. A common intercept on the  $y$ -axis for the  $R_n$  versus PAR correlations was observed, describing  $R_n$  in the absence of light, and photosynthesis, on the previous day.

*Synopsis of GH, GC1, and GC2 experiments*

Overall, in both GH and GC1 experiments, reduced light level on the previous day strongly reduced  $R_n$ , regardless of NT. Increased NT increased leaf-level  $R_n$  in GH and GC1, resulting in a mostly additive effect of light and temperature on  $R_n$ , although factor interactions were also present in some data sets. The two genotypes behaved similarly in terms of absolute  $R_n$  and its responses. For whole-seedling  $R_n$ , light effects were dominant and linear, with no effects of temperature and cultivar observed. An increase in  $R_n$  by a factor of 1.14–1.67 under  $PAR_C$  (1.17–1.58 all light treatment combined) was calculated between 21 °C and 31 °C for the three experiments combined when applying the assumption of linear response of  $R_n$  to NT.  $R_n$  increased by a factor of 1.14–1.82 under  $PAR_C$  (1.18–1.75 all light treatments combined) when applying the assumption of an exponential response of  $R_n$  to NT.

*Effect of treatments and cultivar on leaf non-structural carbohydrate content*

Leaf NSC (sum of starch and SS) concentration decreased similarly after reduced light treatment in GH and GC1 experiments ( $P < 0.001$ ; Fig. 2; Table 5), but no such measurements were made on the whole seedlings in GC2. No interaction between NT, light treatment, and cultivar on leaf NSC content was observed, indicating additive factor effects.

*GH experiment*

Leaf NSC content for  $PAR_C$  light treatment was significantly greater than for  $PAR_M$  and  $PAR_S$  ( $P < 0.05$ ; Table 5) at 55 DAS for the hybrid and 47 DAS for N22, but no significant difference was observed between  $PAR_M$  and  $PAR_S$ . However, for the later sampling dates (83 DAS for the hybrid and 75 DAS for N22), no significant difference in leaf NSC content was observed between the three light treatments, except for N22 under  $T_1$  where leaf NSC content was larger for  $PAR_C$  than for  $PAR_S$  ( $P < 0.05$ ; Table 5).

In contrast to the light factor, NT did not affect leaf NSC regardless of cultivar ( $P > 0.05$ ; Table 5).

There were significant cultivar differences in NSC content. For the later sampling, the hybrid had significantly greater NSC content than N22 ( $P < 0.001$ ). At the earlier sampling (55

DAS for the hybrid and 47 DAS for N22), cultivars also differed significantly in leaf NSC, with hybrid leaves containing higher concentrations than N22 leaves ( $P < 0.05$ ).

*GC1 experiment*

In all cases in GC1, leaf NSC content for  $PAR_C$  was significantly greater than for  $PAR_S$  ( $P < 0.05$ ; Table 5). Similar to the GH experiment, NT did not affect leaf NSC in GC1. Concentrations were generally lower than in the GH experiment, possibly related to different growth conditions.

*Instantaneous leaf respiration response to temperature*

In both GH and GC1, instantaneous temperature response curves of leaf  $R_n$  were measured on plants acclimated to the different NT treatments and pre-treated with different light levels on the preceding day (Fig. 4; Table 6). Temperature responses (between 19 °C and 31 °C at steps of 3 °C) were strictly linear and no hysteresis was observed, as indicated by unchanged  $R_n$  observed at 22 °C before and after the response cycle (not presented). In all cases, coefficients of determination ( $r^2$ ) were always  $\geq 0.98$  (Table 6).

In both GH and GC1, the slopes of the linear  $R_n$  versus temperature correlations were highly significantly different among light levels ( $P < 0.001$ ) in both experiments, whereas effects of NT treatments and cultivars were only observed in the GH experiment (Table 6). An increase in  $R_n$  by an average factor of 2.4 under  $PAR_C$  (same factor for all light treatments combined) was calculated between 21 °C and 31 °C (cultivars, experiments, and temperature conditions confounded).

The differences in  $R_n$  versus  $T$  slopes, regardless of the treatment factor responsible for them, did not change the intercept on the  $x$ -axis where the curves converged. This intercept can be interpreted as a non-acclimated base temperature ( $T_b$ ). The thus estimated  $T_b$  for  $R_n$  (Table 6) averaged at 12.9 °C for GH and 14.3 °C for GC1. It was on average 13.9 °C for the hybrid and 13.3 °C for N22.

*Estimating maintenance respiration*

Maintenance respiration ( $R_m$ ) was estimated as the intercept on  $y$  of the correlation of  $R_n$  versus PAR applied on the previous day (GH and GC1), or as the value of  $R_n$  measured when PAR on the previous day was zero (GC2). Figures 2 and 3 show examples of such correlations. Because of the uncertainty surrounding  $R_m$ , this variable was called  $R_m'$ .

Observed ranges of  $R_m'$  were between 0.0017 and 0.0031  $\mu\text{mol g}^{-1} \text{s}^{-1}$  in GH, 0.0011 and 0.0044  $\mu\text{mol g}^{-1} \text{s}^{-1}$  in GC1, and 0.0057 and 0.0096  $\mu\text{mol g}^{-1} \text{s}^{-1}$  in GC2 (Fig. 5). On average,  $R_m'$  was about twice higher in GC2 than in the two other experiments. Plants in GC2 were much younger (seedling stage) and measurements were conducted on whole plants, as opposed to sections of fully grown leaves in GH and GC1.

Error terms were large for  $R_m'$  because of error accumulation from the many measurements constituting the  $R_m'$  estimate (Fig. 5). NT treatments had no significant impact on  $R_m'$  observed in GH and GC1 ( $P > 0.05$ ). In GC2, a significant



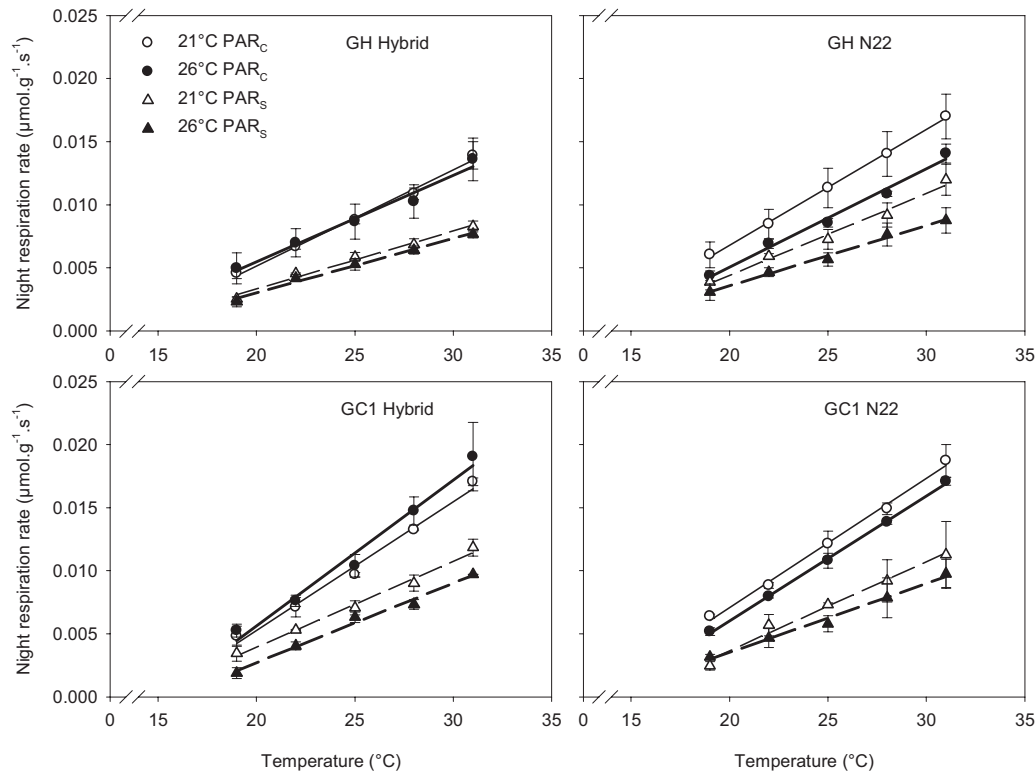

**Fig. 4.** Immediate night leaf respiration response curves to temperature for the hybrid and N22 rice cultivars exposed to  $T_C$  (21 °C, open symbols) or  $T_I$  (26°C, filled symbols) under  $PAR_C$  (circles, 100%) or  $PAR_S$  (triangles, 12% in GH and 4% in GC1) in GH and GC1 experiments. Linear regressions are represented by a fine solid line (21 °C  $PAR_C$ ); thick solid line (26 °C  $PAR_C$ ); fine dashed line (21 °C  $PAR_S$ ); and thick dashed line (26 °C  $PAR_S$ ). Linear regression ( $y=ax+b$ ) details are show in Table 6. Error bars of respiration response curves to temperature=SE of 2 and 4 replications for GC1 and GH, respectively.

**Table 6.** Characteristics of linear regression of instantaneous night respiration rate ( $\mu\text{mol g}^{-1} \text{s}^{-1}$ ) responses to temperature between 19 °C and 31 °C

| Site | Cultivar | Temperature | Light   | Linear regression:<br>$y=ax+b$ |        |       | Apparent $T_{\text{base}}$ | Slope (a)<br>analysis ANOVA |
|------|----------|-------------|---------|--------------------------------|--------|-------|----------------------------|-----------------------------|
|      |          |             |         | a                              | b      | $r^2$ |                            |                             |
| GH   | Hybrid   | $T_C$       | $PAR_C$ | 7.6E-04                        | -0.010 | 0.99  | 13.3                       | L: ***                      |
|      |          |             | $PAR_S$ | 4.6E-04                        | -0.006 | 0.99  | 12.0                       | T: *                        |
|      |          | $T_I$       | $PAR_C$ | 6.9E-04                        | -0.008 | 0.98  | 12.8                       | C: **                       |
|      |          |             | $PAR_S$ | 4.4E-04                        | -0.006 | 0.99  | 13.0                       | LxT: NS                     |
|      | N22      | $T_C$       | $PAR_C$ | 9.2E-04                        | -0.012 | 1.00  | 12.6                       | TxC: NS                     |
|      |          |             | $PAR_S$ | 6.5E-04                        | -0.009 | 0.99  | 13.2                       | LxC: NS                     |
|      |          | $T_I$       | $PAR_C$ | 7.8E-04                        | -0.011 | 0.99  | 13.5                       | LxTxC: NS                   |
|      |          |             | $PAR_S$ | 4.8E-04                        | -0.006 | 0.99  | 12.5                       |                             |
| GC1  | Hybrid   | $T_C$       | $PAR_C$ | 10.2E-04                       | -0.015 | 0.99  | 14.8                       | L: ***                      |
|      |          |             | $PAR_S$ | 6.8E-04                        | -0.010 | 0.99  | 14.2                       | T: NS                       |
|      |          | $T_I$       | $PAR_C$ | 11.6E-04                       | -0.018 | 0.98  | 15.1                       | C: NS                       |
|      |          |             | $PAR_S$ | 6.3E-04                        | -0.010 | 0.99  | 15.7                       | LxT: NS                     |
|      | N22      | $T_C$       | $PAR_C$ | 10.3E-04                       | -0.013 | 0.99  | 13.1                       | TxC: NS                     |
|      |          |             | $PAR_S$ | 7.1E-04                        | -0.010 | 0.99  | 13.9                       | LxC: NS                     |
|      |          | $T_I$       | $PAR_C$ | 9.9E-04                        | -0.014 | 1.00  | 13.9                       | LxTxC: NS                   |
|      |          |             | $PAR_S$ | 5.5E-04                        | -0.007 | 0.99  | 13.5                       |                             |

Plants were acclimatized to 21 °C ( $T_C$ ) or 26 °C ( $T_I$ ) at night.

Light intensities during the previous day were  $PAR_C$  (100%) and  $PAR_S$  (12% GH and 4% GC1).

Three-way ANOVA was performed for slope coefficients. Level of significance is expressed as \*, \*\*, \*\*\*, and NS for  $P<0.05$ ,  $P<0.01$ ,  $P<0.001$ , and  $P>0.05$ , respectively.

effect of NT was observed by ANOVA ( $P < 0.05$ ), but the post-hoc test of Tukey-HSD did not pick up a significant effect (Fig. 5).

The  $R_m'$  was not significantly different between the hybrid and N22 across all experiments for any given temperature treatment ( $P > 0.05$ ). The measured and instantaneous  $R_m'$  was converted to weight of  $\text{CH}_2\text{O}$  consumed per weight of plant dry matter during 1 d, while assuming that  $R_m'$  continued during the day and night (summary in Table 7). Neither daytime temperature effects on  $R_m'$  (which might increase it) nor photosynthesis effects (which might decrease it in leaves) were considered. Thus estimated values varied among experiments, growth stage, and treatments between  $2.9 \text{ mg g}^{-1} \text{ d}^{-1}$  and  $25 \text{ mg g}^{-1} \text{ d}^{-1}$ , or 0.29% and 2.50% weight loss per day (0.43–0.80% in GH, 0.29–1.15% in GC1, and 1.48–2.50% in GC2). Thus,  $R_m'$  represented 0.23–0.50 of  $R_n$  with an average of 0.33 for all experiments combined (Table 7).

In order to obtain a measure of temperature dependency of  $R_m'$  across all data sets, the relative  $R_m'$  was calculated as a fraction of values obtained at 21 °C (Fig. 6), which was the

control treatment common to all experiments. This resulted in a four-point (including control),  $R_m'$  (rel.) versus NT relationship with NT values of 21, 25, 26, and 29 °C. Despite the large error, an approximately linear, positive relationship was found having a slope of  $0.05 \text{ } ^\circ\text{C}^{-1}$ . This slope would translate into a 1.49-fold (or +49%) increase of  $R_m'$  for an increase of temperature from 21 °C (control) to 31 °C (+10 °C).

## Discussion

### Major findings

Mitochondrial respiration, the main source of energy fuelling growth and maintenance processes in plants, can also be seen as a metabolic cost that limits carbon availability for crop productivity. This study investigated rice night respiration ( $R_n$ ) of plants acclimated to different NTs. Because much of  $R_n$  is related to growth (Penning de Vries *et al.*, 1989; Amthor, 2000), and thus depends on assimilate availability, variation of radiation, on the preceding day, was included as a second

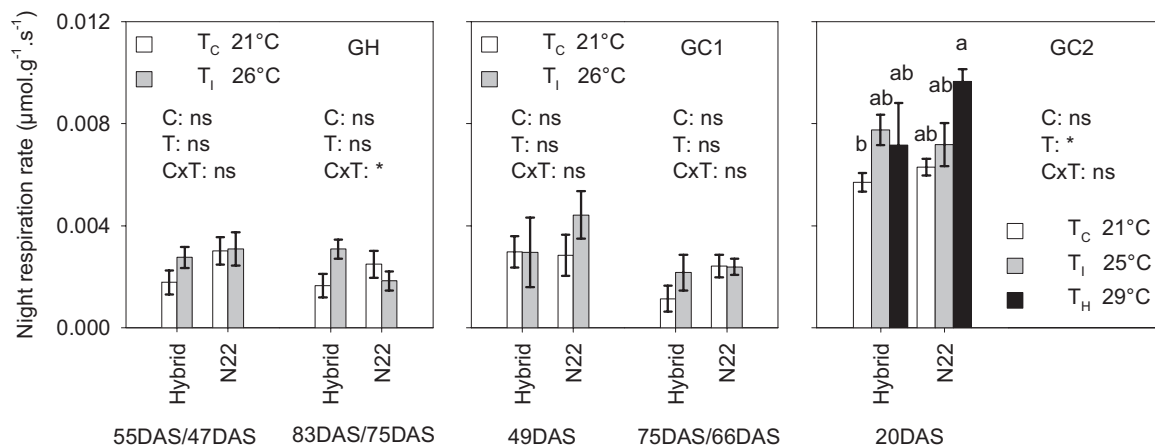

**Fig. 5.** Estimated maintenance respiration ( $R_m'$ ); that is, night respiration rate under conditions of zero incident light on previous day, of leaves acclimated to different night temperatures (T) ( $T_c$ , control temperature, 21 °C;  $T_i$ , increased night temperature, 26 °C GH and GC1; 25 °C GC2;  $T_H$ , high night temperature, 29 °C); for the hybrid and N22 rice cultivars (C) in GH, GC1, and GC2 experiments. In GH and GC1,  $R_m'$  values were extrapolated from light response by linear regressions as in Fig. 2 for measurements on leaf segments, whereas in GC2,  $R_m'$  values were measured directly on whole seedlings having received no light on the previous day as in Fig. 3. Error bars=SE of three, four, and six replications for GC1, GH, and GC2, respectively.

**Table 7.** Estimated maintenance respiration rates ( $R_m'$ ) expressed as  $\text{CH}_2\text{O}$  lost per unit dry matter per day and  $R_m'/R_n$  ratio for the hybrid and N22 rice cultivars exposed to different night temperatures ( $T_c$ , 21 °C;  $T_i$ , 26 °C GH and GC1; 25 °C GC2;  $T_H$ , 29 °C) in GH, GC1, and GC2 experiments

| Site | Cultivar | Code   | $R_m'$ (mg $\text{CH}_2\text{O g}^{-1} \text{ d}^{-1}$ ) |          |          | $R_m'/R_n$ |       |       |
|------|----------|--------|----------------------------------------------------------|----------|----------|------------|-------|-------|
|      |          |        | $T_c$                                                    | $T_i$    | $T_H$    | $T_c$      | $T_i$ | $T_H$ |
| GH   | Hybrid   | 55 DAS | 4.6±1.2                                                  | 7.1±1.1  | –        | 0.30       | 0.33  |       |
|      |          | 83 DAS | 4.3±1.2                                                  | 8.0±1.0  | –        | 0.39       | 0.50  |       |
|      | N22      | 47 DAS | 7.8±1.4                                                  | 8.0±1.7  | –        | 0.45       | 0.34  |       |
|      |          | 75 DAS | 6.4±1.4                                                  | 4.8±1.0  | –        | 0.50       | 0.38  |       |
| GC1  | Hybrid   | 49 DAS | 7.7±1.6                                                  | 7.7±3.5  | –        | 0.24       | 0.23  |       |
|      |          | 75 DAS | 2.9±1.3                                                  | 5.6±1.8  | –        | 0.23       | 0.29  |       |
|      | N22      | 49 DAS | 7.4±2.1                                                  | 11.5±2.4 | –        | 0.26       | 0.28  |       |
|      |          | 66 DAS | 6.3±1.1                                                  | 6.2±0.8  | –        | 0.37       | 0.26  |       |
| GC2  | Hybrid   | 20 DAS | 14.8±0.9                                                 | 20.1±1.5 | 18.6±4.3 | 0.28       | 0.30  | 0.31  |
|      | N22      | 20 DAS | 16.3±0.8                                                 | 18.6±2.2 | 25.0±1.3 | 0.28       | 0.33  | 0.39  |

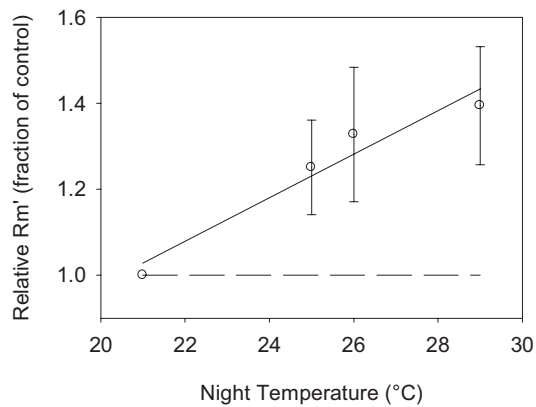

**Fig. 6.** Relationship between relative (fraction of control, 21 °C) estimated maintenance respiration rate ( $R_m'$ ), and night temperature to which the plants were fully acclimated. Symbols represent means for experiments and cultivars combined. Error bars=SE.

environmental factor, resulting in a reduction of the production of assimilate available as respiratory substrate.

Five major findings are reported. First,  $R_n$  both of expanded leaves and of whole seedlings, was positively and linearly correlated with the previous day's incident light resources. Secondly, SS and starch concentration in the leaf during  $R_n$  measurement were linearly correlated with the previous day's light dose and the resulting  $R_n$ , indicating that  $R_n$  is at least partly resource driven. However, increased NT increased the slope of  $R_n$  versus starch and SS concentrations. Thirdly, instantaneous response of  $R_n$  to temperature change was strictly linear, with a converging base temperature of ~13–14 °C regardless of long-term temperature treatment and light history. This instantaneous temperature response of  $R_n$  was very strong, with  $R_n$  increasing by a factor of 2.4 between 21 °C and 31 °C. Fourthly, acclimation to different NTs causes much smaller differences in  $R_n$ : in whole young plants, the effect of a 10 °C increase was 1.20, whereas in fully grown leaves whose  $R_n$  probably had a higher proportion of  $R_m$ , it averaged at 1.67. Lastly,  $R_m'$  based on full acclimation constituted a daily loss of biomass between 0.3% in fully grown leaves and 2.5% in whole seedlings, and increased by a factor of only 1.49 as temperature increased by 10 °C. No consistent cultivar effects on  $R_n$  were observed.

Respiration rates were much higher in whole seedlings than in mature leaves of developed plants, as suggested by Villar *et al.* (1995). Similarly, it was reported that respiration rates for young leaves are higher than for mature leaves, an effect that is not related to photosynthetic rate (Osaki *et al.* 2001). At the whole-plant level, higher  $R_n$  was observed for young than for older lettuce plants, which was explained by the growth rate (van Iersel, 2003). The higher  $R_n$  observed here in rice seedlings can thus be explained by the presence of growth processes in meristems, tiller buds, and expanding organs (Osaki *et al.*, 2001; van Iersel, 2003), whereas growth respiration in mature leaves probably only served assimilate export activity but not local growth.

The observed increase in the linear slope of  $R_n$  versus starch and SS concentrations under increased NT in acclimated plants indicates that higher temperatures increase respiratory assimilate demand at a given level of supply.

### Methodological and conceptual uncertainties

#### Time of night versus $R_n$ measurement

In this study, time of night of measurement, conducted at least 1 h after sunset, did not affect  $R_n$  (Supplementary Fig. S1 available at *JXB* online). In soybean leaves, depletion of SS content occurs within the first hour of the night, followed by a steady state (Mullen and Koller, 1988). Errors in the present study from the assumption of constant  $R_n$  during the night, if any, are small because (i) no temporal trends were observed in the experiments and (ii) sequential  $R_n$  measurements during the night were grouped by replication and not treatment or cultivar, avoiding temporal bias.

#### Estimation of $R_m$ from $R_n$ response to previous day's PAR

The assumption here was that growth is absent if no fresh assimilates are available. This is true in terms of biomass growth because assimilate gain is only possible in the presence of light. However, even if plant biomass growth is zero, stored assimilates (Lafarge *et al.*, 2010) or degradation products from senescing tissue can fuel some structural growth, then involving  $R_g$  (Gifford, 1995; van Iersel, 2003). This is conceptually a grey area: the distinction of  $R_g$  and  $R_m$  is impossible where 'reshuffling' of internal resources occurs. Severe assimilate starvation would also incur new physiological costs for cellular crisis management which would not be part of normal maintenance (Amthor, 2000). Consequently,  $R_m$  and  $R_g$  can not be fully distinguished experimentally because suppressing one would affect the other.

The main arguments for  $R_m'$  being similar to actual functional  $R_m$  are that (i) the response of  $R_n$  to light resources was linear, thus giving credence to the intercept on  $y$  (when PAR=0) as being a baseline respiration rate; and (ii) the mobilizable reserves (starch) in the leaf had disappeared under those conditions. Any longer exposure to assimilate starvation would probably trigger compensatory structural growth such as etiolation that fundamentally changes the system's behaviour.

#### Extrapolation of $R_n$ losses from night to day and leaf to plant

Respiration was measured only at night, although it is a continuous process. The estimation of the carbon cost of  $R_m$  under different temperatures, expressed as a fraction of dry matter loss per day, may be inaccurate when used as generic coefficients in plant models. Indeed, leaf respiration continues during daytime at a lower rate than at night (Brooks and Farquhar, 1985; Villar *et al.*, 1994; Pärnik and Keerberg, 1995; Villar *et al.*, 1995). At 800  $\mu\text{mol photon m}^{-2} \text{s}^{-1}$  and 25 °C, the ratio of daytime respiration rate over  $R_n$  was 0.4 in snow gum (Atkin *et al.*, 2000) and 0.72 in the field for sunflower, kenaf, and *Cynara* on average (Archontoulis *et al.*, 2011). In snow gum, the leaf daytime respiration is inhibited by light between 0 and 200  $\mu\text{mol photon m}^{-2} \text{s}^{-1}$ , higher light intensities having no additional effect (Atkin *et al.*, 2000). Increased temperature also caused an increase in leaf daytime respiration. These reports indicate that daytime respiration behaves differently from  $R_n$  due to interactions with photosynthesis occurring in the same organ.

For the extrapolation of  $R_n$  to 24h, a distinction must thus be made between the leaf and the photosynthetically inactive tissues. Much greater  $R_n$  was observed in whole seedlings than in fully expanded (thus, not growing) leaves, although they had similar  $R_n$  response to the previous day's PAR. Because whole-plant  $R_n$  is proportional to plant nitrogen content (Ingram *et al.*, 1991; Hirai *et al.*, 1997), Penning de Vries *et al.* (1989) suggested to predict organ respiration rates based on nitrogen content. This assertion probably needs to be qualified, given the low  $R_n$  rates observed in young but fully expanded leaves, which have a high nitrogen content (Dingkuhn *et al.*, 1992a, b). The respiratory activity of the plant is therefore probably concentrated in parts of the plant that are both high in nitrogen content and are growing.

Extrapolation of observed  $R_m'$  (night-time) to the whole day for whole seedlings, while ignoring daytime interactions with photosynthesis (which would reduce it) and variable temperature (which would increase it), gave values of fraction of dry matter loss per day of 1.5–2.5%. This is similar to estimations by Penning de Vries (1972) and Penning de Vries *et al.* (1989) and slightly below values reported by McCree (1982).

#### Temperature, the Q10 rule, and acclimation

Short-term temperature effects on leaf  $R_n$  were linear between 19 °C and 31 °C. Rates increased 2.4-fold from 21 °C to 31 °C but the Q10 exponential rule did not apply because of the observed linearity. Other authors reported exponential temperature responses for both daytime respiration and  $R_n$  (e.g. Chi *et al.*, 2013; O'Sullivan *et al.*, 2013). Short-term temperature change, in contrast to long-term change, is reported to have a greater effect on respiration. In wheat, respiration measured at 30 °C was lower for plants acclimated to 30 °C than to 25 °C (Gifford, 1995). The acclimation effect was strong in our study. Acclimated temperature effects for a 10 °C increase were between 1.14 and 1.67 (linear fitting) or between 1.14 and 1.82 (exponential). The instantaneous temperature response of  $R_n$  was thus about twice as strong as the acclimated response. Plants grown under low temperature are more sensitive to a short-term increase in temperature than plants grown under higher temperature (Atkin and Tjoelker, 2003; Silim *et al.*, 2010). The widely used but poorly tested rule of Q10=2 (doubling of rate as  $T$  increases by 10 °C) may thus have limited validity in the field (Amthor, 2000; Atkin and Tjoelker, 2003).

In rice crop models (Bouman *et al.*, 2001; Heinemann, 2008), Q10=2 is frequently used to calculate  $R_m$ . Our results indicate Q10=1.49 for  $R_m'$  but with a large error caused by error propagation and inclusion of several experiments. Similarly, van Iersel (2006) reported acclimated Q10 to be between 1.35 and 1.55 for *Tagetes*.

The surprisingly uniform intercept on the  $x$ -axis for the  $R_n$  versus temperature relationship is similar to the base temperature ( $T_b$ ) reported for development processes in rice (Dingkuhn and Miezán, 1995). Since the apparent  $T_b$  for  $R_n$  was similar for plants acclimated to different temperatures, it is proposed that, at least in rice, temperature acclimation

acts more on the slope of the temperature response than its intercept.

#### Is dark respiration substrate driven?

Respiration might be affected by three parameters. One, the respiratory capacity, which can increase with temperature as suggested in this study. Two, product demand, which was highlighted through the correlation between  $R_n$  and plant nitrogen content (Ingram *et al.*, 1991). However, because much nitrogen is in enzymes, this relationship may also be an indicator of the respiratory capacity. Three, the substrate availability, as reported in this study with the dependence of  $R_n$  on the previous day's incident light resources.

A linear relationship was reported here between  $R_n$  and the previous day's light resources via the tissue's sugar and starch concentration. Similar results were reported for *Quercus rubra* (Whitehead *et al.*, 2004) and wheat (Azcon-Bieto and Osmond, 1983). In the assimilate starvation experiments conducted here, this relationship had a large positive intercept for starch ( $R_n$  continues when starch is used up), but zero intercept for SS ( $R_n$  stops when SSs are missing). At least under severe starvation,  $R_m$  becomes substrate dependent and  $R_g$  is probably nil.

Crop models generally assume that  $R_m$  constitutes a fixed physiological demand at a given temperature and chemical tissue composition (e.g. Bouman *et al.*, 2001). This assumption is inaccurate because physiological stresses, for example, increase the physiological costs of maintenance. For example, Asch *et al.* (2000) observed that rice produced far less biomass per unit of photosynthesis under salinity stress. Conversely, it cannot be excluded that  $R_m$  (or the fraction of  $R_n$  that is not used for growth) might depend on assimilate supply when it is high, and may to some extent be wasteful.

As pointed out by Gifford (2003), the  $R_g/R_m$  paradigm is a notional functional construct. For a modeller, the issue is to predict the organism's carbon balance accurately, and from a crop breeder's perspective it would be to minimize respiratory carbon losses, if genetic diversity for it exists. The present study found no genotypic differences, and it demonstrated a near proportionality between  $R_n$  and assimilate resources. The strong parallel decline in carbohydrates and respiration rates with decreased irradiance lends support for the hypothesis that carbohydrate supply controls respiration rates in rice. However, the possibility cannot be excluded that in parallel with reduced substrate production, shade changed processes such as demand for respiratory product. At a given carbohydrate level, respiration in warmed plants was higher, suggesting a role in demand for ATP or other respiratory products in controlling respiration rates.

## Conclusion

This study showed that  $R_n$  in rice is driven by tissue carbohydrate status and is much more dependent, in these environmental conditions, on short-term light history than temperature if plants are acclimated. The estimated maintenance component  $R_m'$  was ~33% of  $R_n$ . Both  $R_n$  and its component  $R_m'$ , when

acclimated, were less sensitive to temperature than predicted with the  $Q_{10}=2$  rule, although the instantaneous thermal response of  $R_n$  was nearly twice as steep. The  $Q_{10}=2$  paradigm thus overestimates temperature effects on respiration in acclimated plants. Predictions of climate change impacts on vegetation biomass and crop production need more accurate models of respiration. This study provides some evidence but is insufficient to propose better models. Field-based studies are necessary to confirm these results.

## Supplementary data

Supplementary data are available at *JXB* online.

**Figure S1.** Leaf night respiration rate for the hybrid (circles) and N22 (triangles).

## Acknowledgements

Financial support was provided by Bayer CropScience (Belgium), the Centre International de Recherche Agronomique pour le Développement (CIRAD, France), and the Federal Ministry for Economic Cooperation and Development (Germany). The authors would like to thank the dedicated staff of Cirad and the International Rice Research Institute (IRRI, Philippines) for technical support.

## References

- Amthor JS.** 2000. The McCree–de Wit–Penning de Vries–Thornley respiration paradigms: 30 years later. *Annals of Botany* **86**, 1–20.
- Allen RG, Pereira LS, Raes D, Smith M.** 1998. *Crop evapotranspiration. Guidelines for computing crop water requirements*. FAO Irrigation and drainage paper 56.
- Archontoulis SV, Yin X, Vos J, Danalatos NG, Struik PC.** 2011. Leaf photosynthesis and respiration of three bioenergy crops in relation to temperature and leaf nitrogen: how conserved are biochemical model parameters among crop species? *Journal of Experimental Botany* **63**, 895–911.
- Asch F, Dingkuhn M, Dorffling K.** 2000. Salinity increases CO<sub>2</sub> assimilation but reduces growth in field-grown, irrigated rice. *Plant and Soil* **218**, 1–10.
- Atkin OK, Millar AH, Gardeström P, Day DA.** 2000. Photosynthesis, carbohydrate metabolism and respiration in leaves of higher plants. In: Leegood RC, Sharkey TD, Von Caemmerer S, eds. *Photosynthesis: physiology and metabolism*, vol. 9. Dordrecht: Kluwer Academic Publishers, 153–175.
- Atkin OK, Tjoelker MG.** 2003. Thermal acclimation and the dynamic response of plant respiration to temperature. *Trends in Plant Science* **8**, 343–351.
- Azcon-Bieto J, Osmond CB.** 1983. Relationship between photosynthesis and respiration: the effect of carbohydrate status on the rate of CO<sub>2</sub> production by respiration in darkened and illuminated wheat leaves. *Plant Physiology* **71**, 574–81.
- Bergmeyer HU, Gawehn K, Grassi M.** 1974. Enzymes as biochemical reagents. In: Bergmeyer HU, Gawehn K, eds. *Methods of enzymatic analysis*, 2nd edn. New York: Academic Press, 434–435.
- Bouman BAM, Kropff MJ, Tuong TP, Wopereis MCS, Ten Berge HFM, Van Laar HH.** 2001. *ORYZA2000: modeling lowland rice*. International Rice Research Institute, Los Baños, Philippines, and Wageningen University and Research Centre, Wageningen, Netherlands.
- Brooks A, Farquhar GD.** 1985. Effect of temperature on the CO<sub>2</sub>/O<sub>2</sub> specificity of ribulose-1,5-bisphosphate carboxylase/oxygenase and the rate of respiration in the light. *Planta* **165**, 397–406.
- Bunce JA.** 2005. Response of respiration of soybean leaves grown at ambient and elevated carbon dioxide concentrations to day-to-day variation in light and temperature under field conditions. *Annals of Botany* **95**, 1059–1066.
- Cheng W, Sakai H, Yagi K, Hasegawa T.** 2009. Interactions of elevated [CO<sub>2</sub>] and night temperature on rice growth and yield. *Agricultural and Forest Meteorology* **149**, 51–58.
- Chi YG, Xu M, Shen RC, Wan SQ.** 2013. Acclimation of leaf dark respiration to nocturnal and diurnal warming in a semiarid temperate steppe. *Functional Plant Biology* **40**, 1159–1167.
- Chotamonsak C, Salathe EP Jr, Kreasuwan J, Chantara S, Siritwitayakorn K.** 2011. Projected climate change over Southeast Asia simulated using a WRF regional climate model. *Atmospheric Science Letters* **12**, 213–219.
- Dingkuhn M, Miezian KM.** 1995. Climatic determinants of irrigated rice performance in the Sahel. II. Validation of photothermal constants and characterization of genotypes. *Agricultural Systems* **48**, 411–434.
- Dingkuhn M, Schnier HF, Javellana C, Pamplona, R, De Datta SK.** 1992a. Effect of late season nitrogen application on canopy photosynthesis and yield of transplanted and direct seeded tropical lowland rice. I. Growth patterns and yield components. *Field Crops Research* **28**, 223–34.
- Dingkuhn M, Schnier HF, Javellana C, Pamplona, R, De Datta SK.** 1992b. Effect of late season nitrogen application on canopy photosynthesis and yield of transplanted and direct seeded tropical lowland rice. II. Canopy stratification at flowering stage. *Field Crops Research* **28**, 235–49.
- Frantz JM, Cometti NN, Bugbee B.** 2004. Night temperature has a minimal effect on respiration and growth in rapidly growing plants. *Annals of Botany* **94**, 155–166.
- Gifford RM.** 1995. Whole plant respiration and photosynthesis of wheat under increased CO<sub>2</sub> concentration and temperature: long-term vs short-term distinctions for modelling. *Global Change Biology* **1**, 385–396.
- Gifford RM.** 2003. Plant respiration in productivity models: conceptualisation, representation and issues for global terrestrial carbon cycle research. *Functional Plant Biology* **30**, 171–186.
- Heinemann AB, Dingkuhn M, Luquet D, Combres J-C.** 2008. Characterization of drought stress environments for upland rice and maize in central Brazil. *Euphytica* **162**, 395–410.
- Hirai Y, Ehara H, Tsuchiya M.** 1997. Growth respiration in rice organs as affected by nitrogen content. *Japanese Journal of Crop Science* **66**, 640–646.
- Ingram KT, Dingkuhn M, Novero RP, Wijangco EJ.** 1991. Growth and CO<sub>2</sub> assimilation of lowland rice in response to timing and method of N fertilization. *Plant and Soil* **132**, 113–125.
- Intergovernmental Panel on Climate Change. 2013. *Climate change 2013: the physical science basis*. Switzerland: IPCC.
- Jagadish SVK, Craufurd PQ, Wheeler TR.** 2008. Phenotyping parents of mapping populations of rice for heat tolerance during anthesis. *Crop Science* **48**, 1140–1146.
- Kanno K, Mae T, Makino A.** 2009. High night temperature stimulates photosynthesis, biomass production and growth during the vegetative stage of rice plants. *Soil Science and Plant Nutrition* **55**, 124–131.
- Kanno K, Makino A.** 2010. Increased grain yield and biomass allocation in rice under cool night temperature. *Soil Science and Plant Nutrition* **56**, 412–417.
- Lafarge T, Seassau C, Martin M, Bueno C, Clément-Vidal A, Schreck E, Luquet D.** 2010. Regulation and recovery of sink strength in rice plants grown under changes in light intensity. *Functional Plant Biology* **37**, 413–428.
- McCree KJ.** 1970. An equation for the rate of respiration of white clover plants grown under controlled conditions. In: Šetlik I, ed. *Prediction and measurement of photosynthetic productivity*. Wageningen: Centre for Agricultural Publishing and Documentation, 221–229.
- McCree KJ.** 1982. Maintenance requirements of white clover at high and low growth rates. *Crop Science* **22**, 345–351.
- Mohammed AR, Tarpley L.** 2010. Effects of high night temperature and spikelet position on yield-related parameters of rice (*Oryza sativa* L.) plants. *European Journal of Agronomy* **33**, 117–123.
- Mullen JA, Koller HR.** 1988. Trends in carbohydrate depletion, respiratory carbon loss, and assimilate export from soybean leaves at night. *Plant Physiology* **86**, 517–21.
- Nagarajan S, Jagadish SVK, Prasad ASH, Thomar AK, Anand A, Pal M, Agarwal PK.** 2010. Local climate affects growth, yield and

grain quality of aromatic and non-aromatic rice in northwestern India. *Agriculture, Ecosystems and Environment* **138**, 274–281.

**O'Sullivan OS, Weerasinghe KWLK, Evans JR, Egerton JJJ, Tjoelker MG, Atkin OK.** 2013. High-resolution temperature responses of leaf respiration in snow gum (*Eucalyptus pauciflora*) reveal high-temperature limits to respiratory function. *Plant, Cell and Environment* **36**, 1268–1284.

**Osaki M, Shinano T, Kaneda T, Yamada S, Nakamura T.** 2001. Ontogenetic changes of photosynthetic and dark respiration rates in relation to nitrogen content in individual leaves of field crops. *Photosynthetica* **39**, 205–213.

**Pärnik T, Keerbergh O.** 1995. Decarboxylation of primary and end products of photosynthesis at different oxygen concentrations. *Journal of Experimental Botany* **46**, 1439–1477.

**Pelletier S, Tremblay GF, Bertrand A, Bélanger G, Castonguay Y, Michaud R.** 2010. Drying procedures affect non-structural carbohydrates and other nutritive value attributes in forage samples. *Animal Feed Science and Technology* **157**, 139–150.

**Peng SB, Huang JL, Sheehy JE, Laza RC, Visperas RM, Zhong XH, Centeno GS, Khush GS, Cassman KG.** 2004. Rice yields decline with higher night temperature from global warming. *Proceedings of the National Academy of Sciences, USA* **101**, 9971–9975.

**Penning de Vries FWT.** 1972. Respiration and growth. In: Rees A, Cockshull K, Hand D, Hurd R, eds. *Crops processes in controlled environments*. London: Academic Press, 327–347.

**Penning de Vries FWT.** 1975. The cost of maintenance processes in plant cells. *Annals of Botany* **39**, 77–92.

**Penning de Vries F, Jansen D, ten Berge H, Bakema A.** 1989. *Simulation of ecophysiological processes of growth in several annual crops*. Simulation Monographs. Wageningen, The Netherlands: Pudoc.

**Peraudeau S, Roques S, Quinones OC, Fabre D, Van Rie J, Ouwerkerk BFP, Jagadish SVK, Dingkuhn M, Lafarge T.** 2015. Increase in night temperature in rice enhances respiration rate without significant impact on biomass accumulation. *Field Crops Research* **171**, 67–78.

**Prasad PVV, Boote KJ, Allen LH, Sheehy JE, Thomas JMG.** 2006. Species, ecotype and cultivar differences in spikelet fertility and harvest index of rice in response to high temperature stress. *Field Crops Research* **95**, 398–411.

**Silim SN, Ryan N, Kubien DS.** 2010. Temperature responses of photosynthesis and respiration in *Populus balsamifera* L.: acclimation versus adaptation. *Photosynthesis Research* **104**, 19–30.

**Thornley JHM.** 1970. Respiration, growth and maintenance in plants. *Nature* **227**, 304–305.

**Thornley JHM.** 1971. Energy, respiration, and growth in plants. *Annals of Botany* **35**, 721–728.

**Turnbull MH, Murthy R, Griffin KL.** 2002. The relative impacts of daytime and night-time warming on photosynthetic capacity in *Populus deltoides*. *Plant, Cell and Environment* **25**, 1729–1737.

**van Iersel MW.** 2003. Carbon use efficiency depends on growth respiration, maintenance respiration, and relative growth rate. A case study with lettuce. *Plant, Cell and Environment* **26**, 1441–1449.

**van Iersel MW.** 2006. Respiratory Q(10) of marigold (*Tagetes patula*) in response to long-term temperature differences and its relationship to growth and maintenance respiration. *Physiologia Plantarum* **128**, 289–301.

**van Iersel MW, Seymour L.** 2000. Growth respiration, maintenance respiration, and carbon fixation of vinca: a time series analysis. *Journal of the American Society for Horticultural Science* **125**, 702–706.

**Villar R, Held AA, Merino J.** 1994. Comparison of methods to estimate dark respiration in the light in leaves of two woody species. *Plant Physiology* **105**, 167–172.

**Villar R, Held AA, Merino J.** 1995. Dark leaf respiration in light and darkness of an evergreen and a deciduous plant-species. *Plant Physiology* **107**, 421–427.

**Welch JR, Vincent JR, Auffhammer M, Moya PF, Dobermann A, Dawe D.** 2010. Rice yields in tropical/subtropical Asia exhibit large but opposing sensitivities to minimum and maximum temperatures. *Proceedings of the National Academy of Sciences, USA* **107**, 14562–14567.

**Whitehead D, Griffin KL, Turnbull MH, Tissue DT, Engel VC, Brown KJ, Schuster WSF, Walcroft AS.** 2004. Response of total night-time respiration to differences in total daily photosynthesis for leaves in a *Quercus rubra* L. canopy: implications for modelling canopy CO<sub>2</sub> exchange. *Global Change Biology* **10**, 925–938.

**Yin X, Kropff MJ, Goudriaan J.** 1996. Differential effects of day and night temperature on development to flowering in rice. *Annals of Botany* **77**, 203–213.

**Yoshida S.** 1981. *Fundamentals of rice crop science*. Manila, Philippines: International Rice Research Institute Press.

**Yoshida S, Forno DA, Cock JH, Gomes KA.** 1976. *Laboratory manual for physiological studies of rice*. Manila, Philippines: International Rice Research Institute Press.

**Yoshimoto M, Fukuoka M, Hasegawa T, et al.** 2012. MINCERnet: a global research alliance to support the fight against heat stress in rice. *Journal of Agricultural Meteorology* **68**, 149–157.
